# Supplementary material for: Stress-activated MAPKs and CRM1 regulate the subcellular localization of Net1A to control cell motility and invasion
Source: Oxford University Press journal article supplement (doi:10.1242/jcs.204644), 2018-02-01
Supplement: jcs204644supp.pdf [file jcs204644supp.pdf]

## SUPPLEMENTARY FIGURES

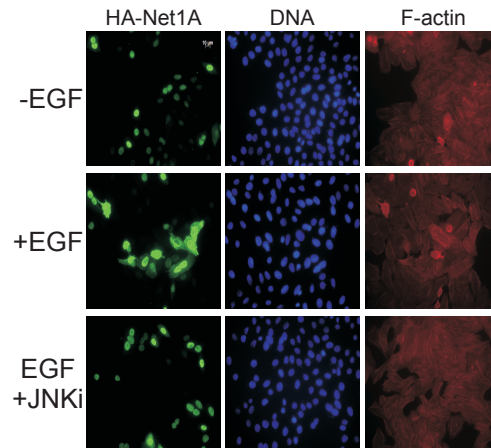

**Supplementary Fig. 1.** Immunofluorescence imaging of MCF7 cells at 40X magnification. MCF7 cells were transfected with HA-Net1A and serum starved overnight. Some cells were stimulated with EGF (100 ng/ml, 15 min) in the presence or absence of JNK inhibitor (SP600125, 10  $\mu$ M). HA-Net1A is shown in green, DNA in blue, and F-actin in red. Representative images are shown.

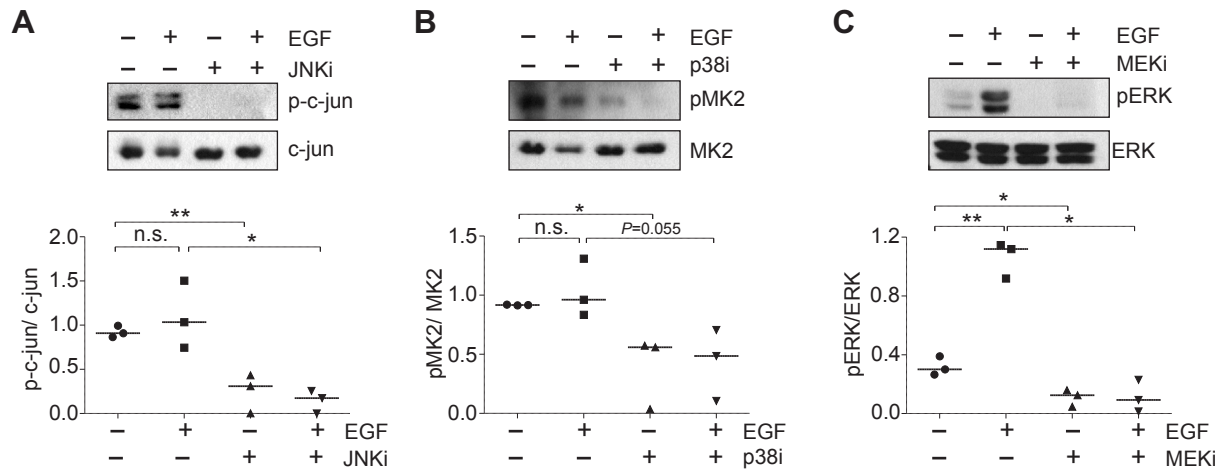

**Supplementary Fig. 2.** Effects of JNK, p38, and MEK inhibitors on corresponding downstream signaling. MCF7 cells were transfected with HA-Net1A and serum starved overnight. Some cells were stimulated with EGF (100 ng/ml) for 15 min. Prior to EGF stimulation some cells were pretreated with (A) JNK inhibitor (SP600125, 10  $\mu$ M), (B) p38 inhibitor (SB202190, 10  $\mu$ M), or (C) MEK inhibitor (UO126, 10  $\mu$ M) for 30 min. Cells were then lysed for Western blot analysis to detect p-c-jun, c-jun (A), p-MK2, MK2 (B), p-ERK1/2, and ERK1/2 (C). Signal intensities were quantified using ImageJ. Quantification is from three independent experiments. Bars are median values. \* =  $P < 0.05$ ; \*\* =  $P < 0.01$ . n.s. = not significant.

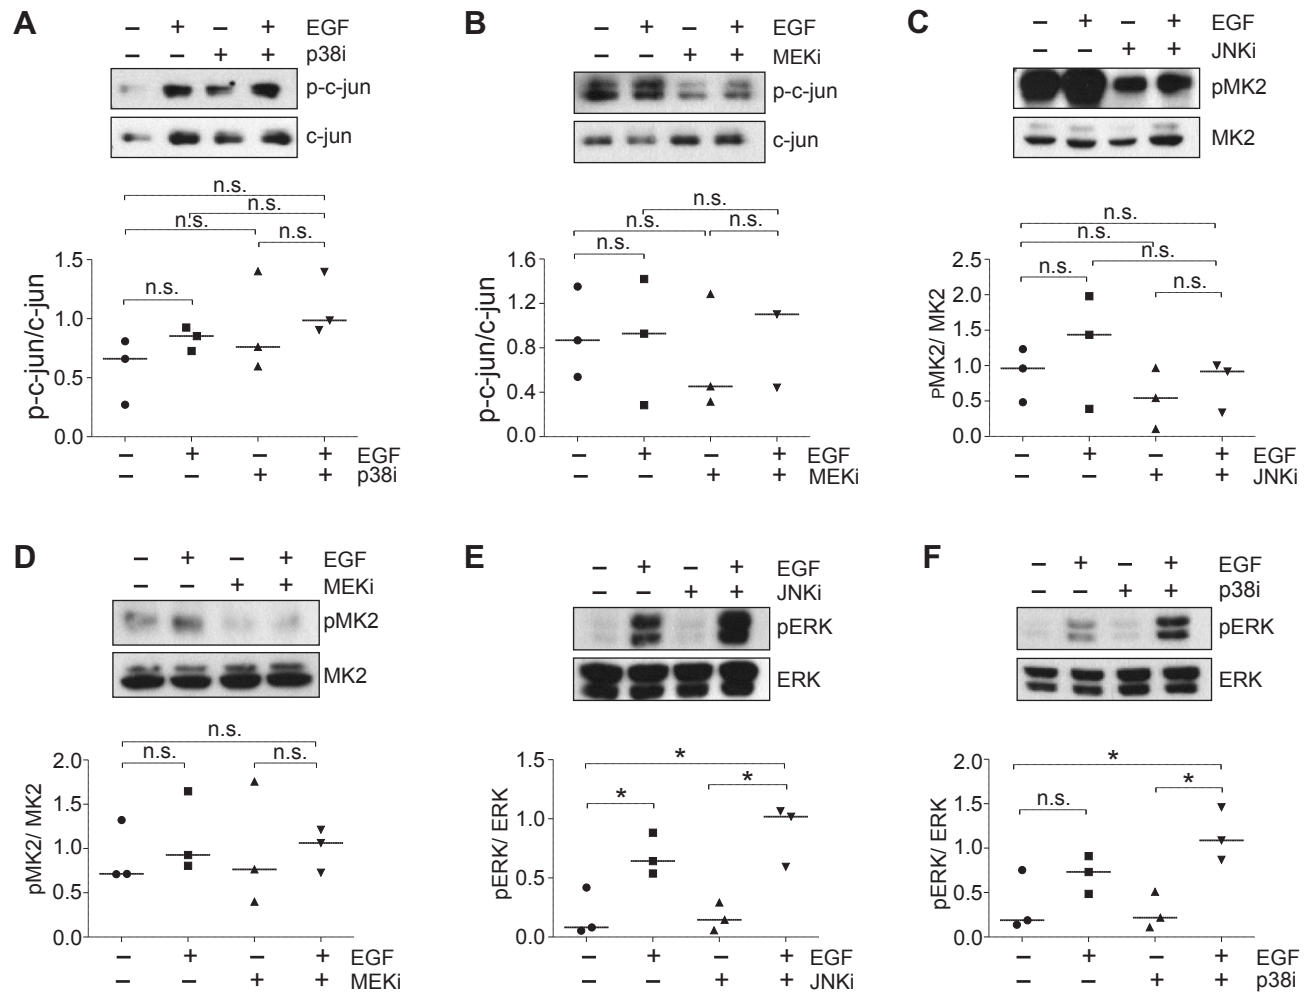

**Supplementary Fig. 3.** Effects of JNK, p38, and MEK inhibitors on signaling within different MAPK pathways. MCF7 cells were transfected with HA-Net1A and serum starved overnight. Some cells were then stimulated with EGF (100 ng/ml) for 15 min. Prior to EGF stimulation some cells were pretreated with (A, F) p38 inhibitor (SB202190, 10  $\mu$ M), (B, D) MEK inhibitor (UO126, 10  $\mu$ M), or (C, E) JNK inhibitor (SP600125, 10  $\mu$ M) for 30 min. Cells were then harvested for Western blot analysis to detect p-c-jun, c-jun, p-MK2, MK2, p-ERK1/2, and ERK1/2. Signal intensities were quantified using ImageJ. Quantification is from three independent experiments. Bars are median values. \* =  $P < 0.05$ . n.s. = not significant.

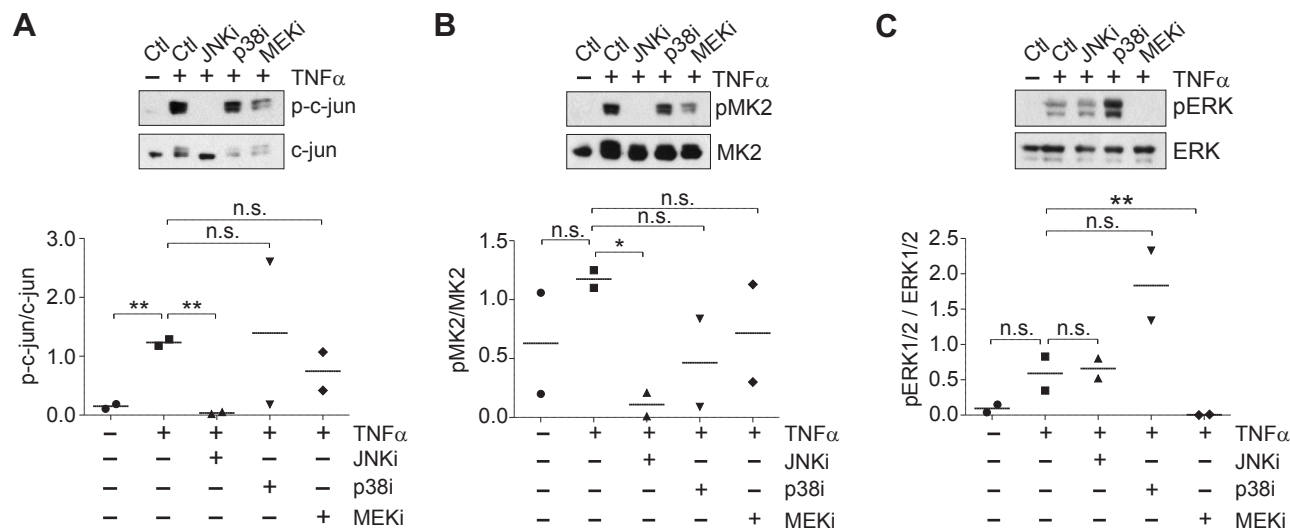

**Supplementary Fig. 4.** Effects of TNF- $\alpha$  and MAPK inhibitors on JNK, p38, and ERK activity. MCF7 cells were transfected with HA-Net1A and serum starved overnight. Some cells were then stimulated with TNF- $\alpha$  (10 ng/ml) for 30 min. Prior to TNF- $\alpha$  stimulation some cells were pretreated with JNK inhibitor (SP600125, 10  $\mu$ M), p38 inhibitor (SB202190, 10  $\mu$ M), or MEK inhibitor (UO126, 10  $\mu$ M) for 30 min. Representative Western blots (top) and quantification of phospho-c-jun, phospho-MK2, and pERK1/2 (bottom). Quantification is from two independent experiments. Bars are median values. \* =  $P < 0.05$ ; \*\* =  $P < 0.01$ . n.s. = not significant.
